# Supplementary material for: Correlations between fluorescence emission and base stacks of nucleic acid G-quadruplexes
Source: Royal Society of Chemistry journal article supplement (doi:10.1039/c6ra21347b), 2016-01-01
Supplement: c6ra21347b1.pdf [file c6ra21347b1.pdf]

## **Support Information for:**

# **Correlations between Fluorescence Emission and Base Stacks of Nucleic Acid G-quadruplexes**

Shang Gao, Yanwei Cao, Yuting Yan, Xiaoxuan Xiang and Xinhua Guo  
College of Chemistry, Jilin University, Changchun, China, 130012

Address reprint requests to:

Prof. Xinhua Guo

Address: 2699 Qianjin Street, Changchun China, 130012

Phone number: 86-431-89228949

Fax number: 86-431-89228949

Email: [guoxh@jlu.edu.cn](mailto:guoxh@jlu.edu.cn)

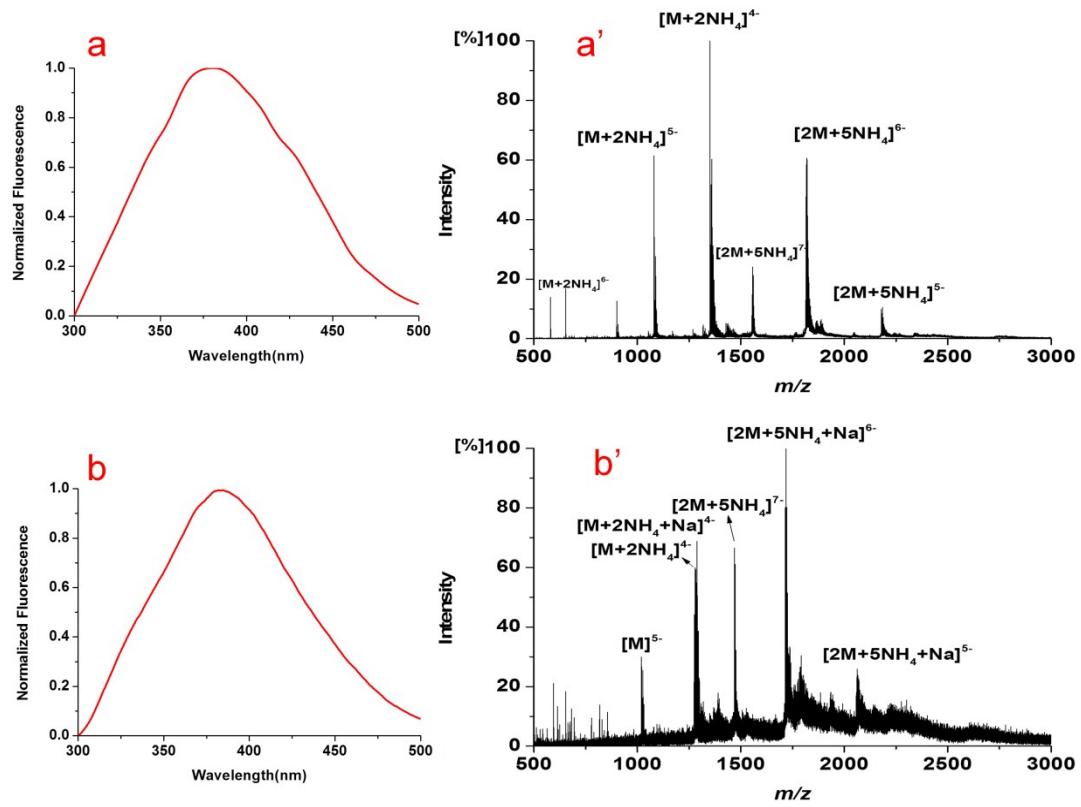

Figure S1. (a) Fluorescence spectrum of T30177; (a') Mass spectrum for T30177; (b) Fluorescence spectrum of NG16; (b') Mass spectrum for NG16;

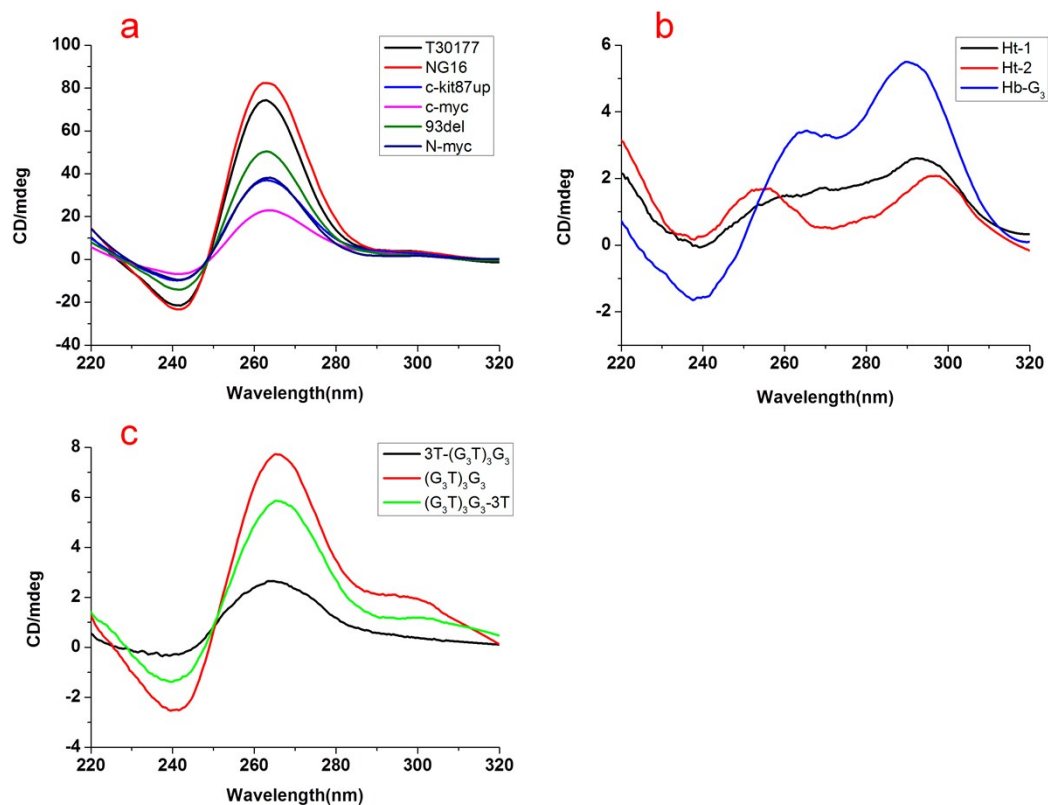

Figure S2. (a) CD spectra of partial parallel G-quadruplexes in Table 1, including N-myc sequence; (b) Hybrid (3+1) CD spectra; (c) CD spectra of sequences that are expected to form higher-ordered structures;

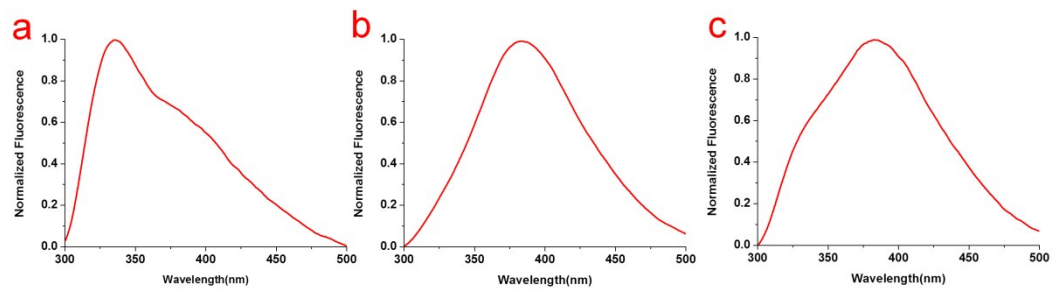

Figure S3. (a) Fluorescence spectrum of 93del; (b) Fluorescence spectrum of T30695; (c) Fluorescence spectrum for the mixture of 93del and T30695

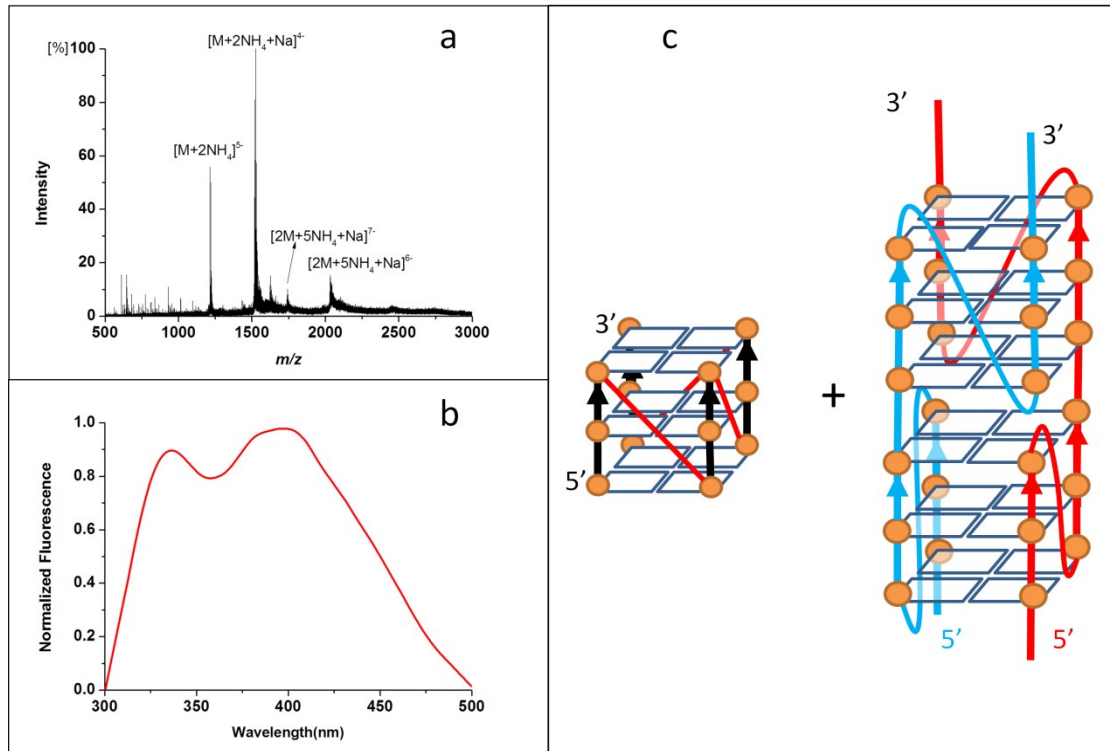

Figure S4. (a) Mass spectrum for N-myc; (b) Fluorescence spectrum for N-myc; (c) Schematic diagram of the N-myc monomers and parallel dimers.

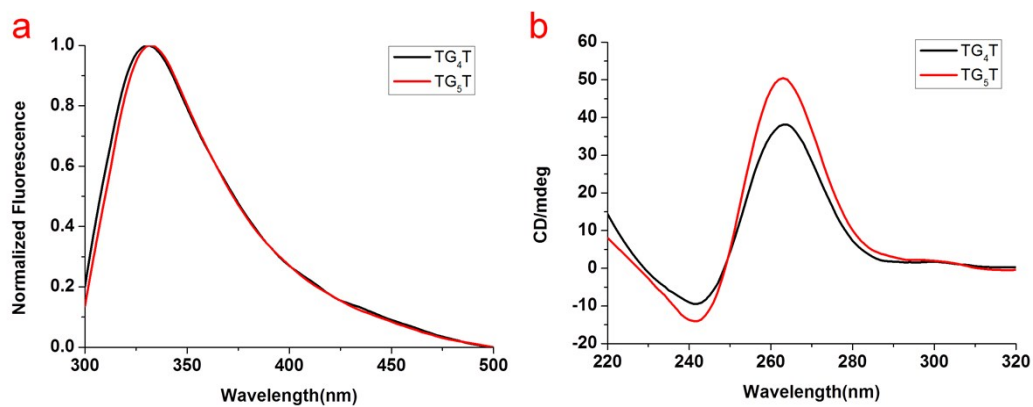

Figure S5. (a) Fluorescence spectra of TG<sub>4</sub>T and TG<sub>5</sub>T. (b) CD spectra of TG<sub>4</sub>T and TG<sub>5</sub>T. Since these two sequences were able to form tetramolecular G-quadruplexes, the strand concentration were 200  $\mu$ M and ion condition was 60 mM.
